# Supplementary material for: Development of a Machine Learning Model to Predict Non-Durable Response to Anti-TNF Therapy in Crohn’s Disease Using Transcriptome Imputed from Genotypes
Source: MDPI journal article supplement (doi:10.3390/jpm12060947), 2022-06-09
Supplement: s1 [file s1]

**Table S1.** Average performance of various tissue models with the top significant feature

| Tissue of<br>PrediXcan<br>model         | Selected features      | Feature<br>selection<br>frequency<br>out of 100<br>repeats | AUC-ROC<br>(SD)     |                  | AUC-PRC<br>(SD)     |                  |
|-----------------------------------------|------------------------|------------------------------------------------------------|---------------------|------------------|---------------------|------------------|
|                                         |                        |                                                            | Training<br>5CV set | Test set         | Training<br>5CV set | Test set         |
| Whole<br>Blood                          | <i>DPY19L3</i>         | 79                                                         | 0.845<br>(0.027)    | 0.839<br>(0.070) | 0.418<br>(0.072)    | 0.460<br>(0.169) |
| Colon<br>Transverse                     | <i>TXNDC16</i>         | 40                                                         | 0.728<br>(0.060)    | 0.711<br>(0.152) | 0.409<br>(0.081)    | 0.416<br>(0.199) |
| Small<br>Intestine<br>Terminal<br>Ileum | <i>ENSG00000270127</i> | 14                                                         | 0.738<br>(0.045)    | 0.720<br>(0.120) | 0.291<br>(0.061)    | (0.129)          |

5-CV, 5-fold cross-validation; AUC-ROC, area under the receiver operating characteristic curve;

AUC-PRC, area under the precision-recall curve

**Table S2.** Average performance of the whole blood models without clinical features

| Feature selection frequency out of 100 repeats | Selected features            | AUC-ROC (SD)     |                  | AUC-PRC (SD)     |                  |
|------------------------------------------------|------------------------------|------------------|------------------|------------------|------------------|
|                                                |                              | Training 5CV set | Test set         | Training 5CV set | Test set         |
| 79                                             | <i>DPY19L3</i>               | 0.845<br>(0.027) | 0.839<br>(0.070) | 0.418<br>(0.072) | 0.460<br>(0.169) |
| 32                                             | <i>DPY19L3, GSTT1</i>        | 0.918<br>(0.023) | 0.919<br>(0.040) | 0.571<br>(0.078) | 0.595<br>(0.160) |
| 9                                              | <i>DPY19L3, GSTT1, NUCB1</i> | 0.935<br>(0.024) | 0.935<br>(0.041) | 0.676<br>(0.080) | 0.700<br>(0.157) |

5-CV, 5-fold cross-validation; AUC-ROC, area under the receiver operating characteristic curve;

AUC-PRC, area under the precision-recall curve

**Table S3.** Average performance of the whole blood models with fixed clinical features

| No. of features | Features                           | AUC-ROC<br>(SD)     |                  | AUC-PRC<br>(SD)     |                  |
|-----------------|------------------------------------|---------------------|------------------|---------------------|------------------|
|                 |                                    | Training<br>5CV set | Test set         | Training<br>5CV set | Test set         |
| 8               | <i>CRF</i>                         | 0.568<br>(0.088)    | 0.603<br>(0.117) | 0.155<br>(0.062)    | 0.186<br>(0.097) |
| 9               | <i>CRF + DPY19L3</i>               | 0.788<br>(0.058)    | 0.811<br>(0.102) | 0.328<br>(0.093)    | 0.390<br>(0.157) |
| 10              | <i>CRF + DPY19L3, GSTT1</i>        | 0.903<br>(0.034)    | 0.920<br>(0.050) | 0.513<br>(0.097)    | 0.580<br>(0.170) |
| 11              | <i>CRF + DPY19L3, GSTT1, NUCB1</i> | 0.928<br>(0.028)    | 0.943<br>(0.042) | 0.587<br>(0.093)    | 0.675<br>(0.172) |

5-CV, 5-fold cross-validation; AUC-ROC, area under the receiver operating characteristic curve;

AUC-PRC, area under the precision-recall curve

**Table S4.** Average sensitivity, specificity, and precision of the whole blood models with the test set

| Features |                       | Sensitivity (SD)* | Specificity (SD)* | Precision (SD)* |
|----------|-----------------------|-------------------|-------------------|-----------------|
| -CRF     | DPY19L3               | 0.920 (0.128)     | 0.720 (0.166)     | 0.306 (0.189)   |
|          | DPY19L3, GSTT1        | 0.998 (0.025)     | 0.831 (0.079)     | 0.396 (0.146)   |
|          | DPY19L3, GSTT1, NUCB1 | 0.985 (0.060)     | 0.846 (0.100)     | 0.456 (0.223)   |
| +CRF     | -                     | 0.855 (0.198)     | 0.528 (0.196)     | 0.169 (0.089)   |
|          | DPY19L3               | 0.930 (0.129)     | 0.712 (0.160)     | 0.283 (0.147)   |
|          | DPY19L3, GSTT1        | 0.998 (0.025)     | 0.833 (0.099)     | 0.418 (0.180)   |
|          | DPY19L3, GSTT1, NUCB1 | 0.990 (0.049)     | 0.879 (0.081)     | 0.488 (0.169)   |

\*Model training by 5-fold cross-validation and evaluation with test set was repeated 100 times. For each run, a cutoff dividing NDR vs DR was determined as the point where the Youden's index of ROC was maximal. The sensitivity, specificity, and precision were then measured.
